# Supplementary material for: Dual functionality metamaterial enables ultra-compact, highly sensitive uncooled infrared sensor
Source: publisher site journal article supplement (doi:10.1515/nanoph-2020-0607), 2021-01-01
Supplement: Supplementary file 1 [file j_nanoph-2020-0607_suppl.docx]

Supporting Information

Dual Functionality Metamaterial Enables Ultra-compact, Highly Sensitive Uncooled Infrared Sensor

Jin Tao, Zhongzhu Liang, Guang Zeng, Dejia Meng, David R. Smith, Qing Huo Liu, Qingrui Yang, Menglun Zhang, Wei Pang, Jingqiu Liang, Tarik Bourouina*

**Supplementary section 1. NETD Performance of IR Detectors – Comparison with State-of-the art**

**Table 1** and **Table 2** provides values of the NETD of different kinds of infrared detectors, for uncooled and cooled detectors, respectively [S1-S5]. From these tables, it clearly appears that the NETD of 5,5 mK reported in our work is at the state-of-the-art, at least within the wavelength range of interest. This is of particular significance since our result was achieved based on uncooled detector, while the only other device reaching this performance level requires cooling at 77K [S5].

| **Organization / Reference** | **Types** | **Wavelength** | **Cooled**  **/Uncooled** | **Pitch**  **[μm]** | **NETD [mK]** |
| --- | --- | --- | --- | --- | --- |
| SCD [S1] | Microbolometer | 8μm-14μm | Uncooled | 17 | 20 |
| NEC [S1] | Microbolometer | 8μm-14μm | Uncooled | 12 | 63 |
| DRS [S1] | Microbolometer | 8μm-14μm | Uncooled | 17 | 50 |
| Mitsubishi [S1] | Microbolometer | 8μm-14μm | Uncooled | 15 | 84 |
| Toshiba [S1] | Microbolometer | 8μm-14μm | Uncooled | 22 | 40 |
| UESTC [S1] | Microbolometer | 8μm-14μm | Uncooled | 35 | 81 |
| FLIR [S2] | Microbolometer | 7.5μm-13.5μm | Uncooled | 12 | 40 |
| Global Sensor Technology [S3] | Microbolometer | 8μm-14μm | Uncooled | 12 | 40 |
| **This work** | **FBAR/PMA** | **7.5μm-8.5 μm** | **Uncooled** | **~100** | **5.5** |

**Table 1** – Uncooled infrared detectors State of the art of Noise Equivalent Temperature Difference (NETD)

| **Organization / Reference** | **Types** | **Wavelength** | **Cooled**  **/Uncooled** | **Pitch**  **[μm]** | **NETD [mK]**  **(@T [K])** |
| --- | --- | --- | --- | --- | --- |
| Sofradir [S1] | HgCdTe homojunction | 3.4μm -4.9μm | Cooled | 10 | 26 (@90K)  46 (@140K) |
| Global Sensor Technology [S4] | Type-II superlattice | 7.7μm-9.5μm | Cooled | 10 | 35 (@80K) |
| **Fraunhofer [**S5**]** | **QWIP** | **8-12μm** | **Cooled** | **22** | **5.2 (@77K)** |

**Table 2** – Cooled infrared detectors State of the art of Noise Equivalent Temperature Difference (NETD)

**Supplementary section 2. Design of the plasmonic metamaterial absorber (PMA)**

Besides their numerous wavelength and polarization-selective capabilities, plasmonic metamaterials have also been reported to be used as infrared absorbers [S6]. The physical origin of the absorption effect relies on the excitation of localized magnetic and electric dipole resonances, which is different from the ideas of using metallic surfaces with spherical nanovoids, metallic gratings or dark materials. In our design, the PMA consists of a layer of gold array and a Mo film, separated by an AlN dielectric layer, as shown in Figure S1a. We first perform numerical computations using finite-difference-time-domain (FDTD) method to investigate the relationship between the absorption spectrum and the geometric dimensions of structure, which leads to the design of a PMA with a set of practicable parameters within the specific long wavelength target of 8.2 µm in the infrared spectral range.

The model of the periodic unit cell of the PMA simulated in the FDTD software is shown in Figure S1b. The pitch of the periodic unit cell is set as 3 μm. The thickness of AlN and length of Au pad are given by *tAlN* and *a*, respectively. The thickness of Mo is fixed to 200 nm, which has no influence on the absorption when it is two times greater than the skin depth. The thickness of Au is fixed to 100 nm. *tAlN* has a strong influence on both the resonant absorption peak wavelength (*λR*) and maximum of the absorption, as shown in Figure S1c. When *tAlN* is set to 200 nm, high absorption of 96% is achieved due to the near-field plasmonic coupling between the gold array and the continuous Mo film. As the dielectric layer thickness increases, the coupling strength decreases first until reaching the minimum absorption, which then increases thereafter. This trend can be understood as follows; when Au array is far away from the Mo film, the resonant absorption decreases, while in the same time the absorption contribution of the AlN layer’s dielectric loss increases.

Although this work was targeting a specific wavelength of 8.2 μm –chosen for demonstration purposes of a wavelength-selective device within the atmospheric window, there is a room for tuning this wavelength by adjusting design parameters, not only for tuning the center wavelength (as shown in Figure S1b) but also the corresponding bandwidth (as shown in Figure S1a). Dependences of the absorbance on wavelength and length of Au pad for *tAlN* = 200 nm are shown in Figure S1d. *λR* can be altered over a broad spectral range by changing the length of Au pad. As *a* increases, the absorption spectrum is red-shifted, while *a* has small influence on the max absorption. If one target widening the absorption bandwidth, one can adjust *tAlN* accordingly at values above 200 nm, but this would be at the expense of a slightly lower absorption (Figure S1a).

**Figure S1** (a) Schematic layout of the PMA. (b) Model of the periodic unit cell of the PMA. (c) Absorption spectrum as a function of the thickness of AlN, where the thickness of Au is100 nm and the length of Au patterns is 2.0 μm. (d) Absorption spectrum as a function of the length of Au pad, where the thickness of Au is 50 nm and *tAlN* is 200 nm.

**Supplementary section 3. Fabrication**

The FBAR-based IR sensor was fabricated using a CMOS-compatible MEMS process involving a combination of photolithography and EBL, as illustrated in Figure S2a. The fabrication started with a high-resistivity silicon wafer. First, a cavity was etched, and then a sacrificial layer of phosphosilicate glass (PSG) was deposited onto the surface of the wafer. The PSG should fill the cavity. A chemical mechanical polishing (CMP) technique was used to planarize the top surface. The silicon on both sides of the cavity should be exposed. The bottom electrode (Mo), piezoelectric layer (AlN), top electrode (Mo), and passivation layer (AlN) were then deposited and patterned sequentially. The photolithography processes are omitted in the schematic. The metal array of gold was fabricated through a lift-off process, with EBL used for patterning. Finally, the sacrificial layer was dissolved in aqueous HF solution to form the air cavity.

**
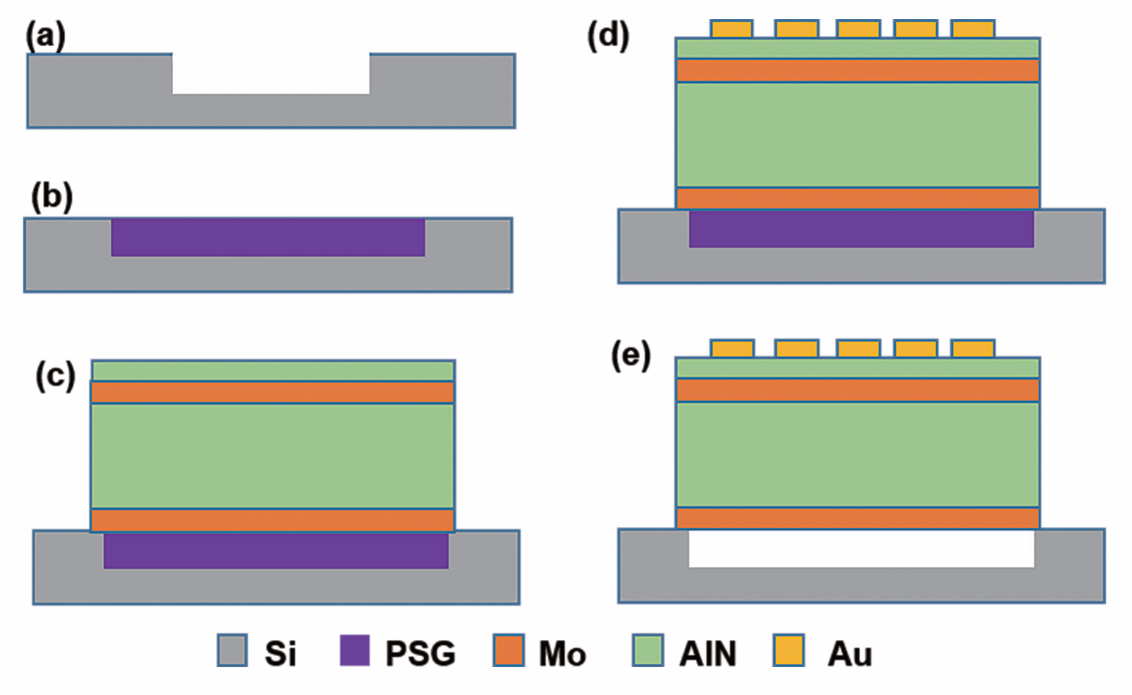
**

**Figure S2.** Device fabrication process. (a) Etch the silicon substrate to form an air cavity. (b) Deposit a scarify layer to fill the air cavity and grind the surface smooth by CMP. (c) Deposit Mo/ALN/Mo/AlN layers. (d) Fabrication of Au array by EBL and a lift-off process. (e) Release the sacrificial layer to form the air cavity.

**Supplementary section 4. Film bulk acoustic wave resonator (FBAR)**

An FBAR is a micro-transducer consisting of a piezoelectric layer, sandwiched between two electrodes, which is acoustically isolated from the surrounding medium. FBARs are commonly used in commercial RF filters, and have been widely applied in scientific research (gravimetric sensors, biochemical sensing, and gas sensors) because of their high quality factor (*Q*), small size, ability to form all-silicon packages, and reliability. The design and optimization of FBARs is based on a lumped modified Butterworth–Van Dyke (mBVD) model [S7], as shown in Figure S3a, where *C0* represents the static capacitance between metal electrodes, *R0* represents mechanical energy leakage and/or dielectric loss. *Cm*, *Lm*, and *Rm* represent the parameters of the motional resonance that is coupled to the voltage across the AlN plate capacitor. *Rs* represents the electrical resistance of the connecting electrodes. The performance of an FBAR is characterized in terms of resonance frequencies, effective coupling constant *kt*2, and *Q*. Figure S3b shows the impedance–frequency curve. The series resonance frequency (*fs*) is determined by the motional reactances *Lm* and *Cm*. It is recognizable on the impedance plot as the frequency of minimum impedance. The parallel resonance frequency (*fp*) is determined as the frequency of maximum impedance and is related to *Lm* and *Cm* as well as *C0*. *kt2* shows the capability of the electro-mechanical transformation in a system and is related to the difference of *fs* and *fp*. Quality factors are a measure of losses in the system. The very basic definition follows from the ratio of the total energy in the system to the power lost in a half-cycle. The series and parallel resonance frequency are calculated as and *kt2* and *Q* are calculated as and, where is the phase response of the impedance [S8]. From mechanical point-of-view, the frequency of the FBAR relates to a longitudinal vibration mode exhibiting stretching along the thickness of the multilayer stack.

**Figure S3** (a) Lumped mBVD model of FBAR. (b) Frequency response of FBAR.

**Supplementary section 5. Measurement of the uncooled IR sensor**

The IR response of the proposed device was measured by exciting the resonator at a single frequency between *fs* and *fp*. The responsivity is proportional to the slope of the impedance–frequency curve. The FBAR stack was optimized so as to maximize the slope of this curve. When the metal array was deposited on the surface of the FBAR, the vertical resonance mode split into two modes, as illustrated in Figure S4. Figure S4a shows the uniform acoustic resonance in the vertical direction. After adding the gold array, the resonance divided into two modes, as shown in Figure S4b. One of these degenerated modes is along the acoustic path of the Mo-AlN-Mo-AlN stack as indicated by black arrows, which is the same as in Figure S4a and this mode corresponds to the frequency *fs*. The other mode is along the acoustic path of Mo-AlN-Mo-AlN-Au stack as indicated by blue arrows. This second mode causes a small resonance peak below *fs*, as shown in Figure 2a. The latter mode is indeed related to a mass loading mechanism leading to a downshift resonance frequency compared to *fs*. The above-described mode division also causes dispersion of the resonant mechanical energy, reducing the electromechanical conversion efficiency, and in turn decreasing *kt*2. However, it is fortunate that *fs* and *fp* became closer. Indeed, at the interface between the FBAR and the metal array, the acoustic wave scattering was enhanced, which decreased *Qp*, while the metal array restricted the propagation and leakage of the transverse waves, which increased *Q*s. Thereby, the slope of the impedance–frequency curve increased, which indicates an increase in the sensitivity of the sensor.


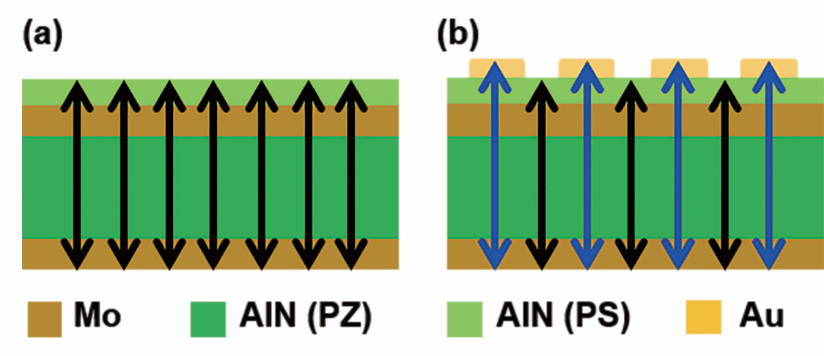


**Figure S4.** (a) Uniform acoustic resonance in vertical direction. (b) After adding the gold array, the resonance divided into two modes.

The frequency response of the FBAR was characterized by measuring its impedance with a network analyzer. The measurement bandwidth (intermediate frequency (IF) bandwidth) of the network analyzer was set to 200 Hz to obtain the best noise performance. A Short-Open-Load-Thru (SOLT) impedance calibration of the Ground-Signal-Ground (GSG) probes and network analyzer was carried out to ensure the accuracy of the results. The reflectance R of the PMA was measured by an FTIR microscope (Thermo Scientific, Nicolet iN10). A reflective gold mirror was used as a background for calibration. The absorption A was then calculated as A=1−R.

The response of the proposed IR sensor was calculated as the frequency shift under different incident IR intensities. In the setup shown in Figure S5, a Globar (*IRSD, IR301*) was used as the IR source. A filter (*Thorlabs, FB8000-500*，bandwidth 8 ± 0.5 μm) was used to suppress undesirable parts of the incident IR radiation and a convex lens (*Thorlabs, LA9509-E3*) was used to focus the incident IR radiation on the PMA. The intensity of IR received by the sensor was calibrated using an IR power meter (*CNI, HS5*). The frequency response was measured by a network analyzer (*Agilent, E5071C*). The proposed sensor was connected to the network analyzer through GSG probes (*GGB, Mode 40A*) and SMA cables.

Regarding the prospect of a fully-integrated CMOS solution, rather than using a Network Analyzer, the frequency readout could be ultimately achieved by a CMOS Integrated Circuit, as shown for instance by Sung et al. [S9], where the fabrication of both the FBAR and the CMOS IC can be integrated, so does the PMA.

**Figure S5** Measurement setup of the FBAR-based uncooled IR sensor.

**Supplementary section 6. Noise measurement of the proposed sensor**

The frequency noise of the proposed sensor was measured by monitoring the short-term frequency instability, as shown in Figure S6, under normal temperature and pressure conditions. The peak-to-peak frequency fluctuation was 2 kHz and the root mean square (RMS) noise (calculated by dividing the peak-to-peak frequency fluctuation by 6.6 for a 99.9% confidence level) was found to be 0.3 kHz. Finally, the frequency noise spectral density, calculated by dividing the RMS frequency noise by the square root of the measurement bandwidth (200 Hz), was found to be ~21.2 Hz·Hz-1/2.


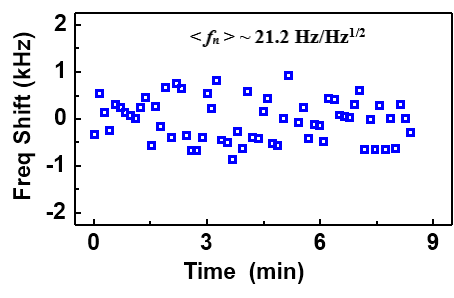


**Figure S6** Noise measurement of the proposed sensor.

**Supplementary References**

[S1] (ref. [1] in the main manuscript) Rogalski, A.; Martyniuk, P.; Kopytko, M. Challenges of Small-Pixel Infrared Detectors: A Review. *Reports Prog. Phys.* **2016**, *79* (4). <https://doi.org/10.1088/0034-4885/79/4/046501>.

[S2] FLIR <https://www.flir.cn/products/boson/>

[S3] Global Sensor Technology, PLUG series cooled detectors <http://www.gst-ir.com/product/detail/id/50.html>

[S4] Global Sensor Technology, uncooled detector product reference C615S LWIR <http://www.gst-ir.com/product/detail/id/35.html>

[S5] Schneider H, Walther M, Fleissner J, et al. Low-noise QWIPs for FPA sensors with high thermal resolution[C]//Infrared Technology and Applications XXVI. International Society for Optics and Photonics, 2000, 4130: 353-362.

[S6] Hao, J. *et al.* High performance optical absorber based on a plasmonic metamaterial. *Appl. Phys. Lett.***96,** 3–5 (2010).

[S7] Larson, J. D., Bradley, P. D., Wartenberg, S. & Ruby, R. C. Modified Butterworth-Van Dyke Circuit for FBAR Resonators and Automated Measurement System. *Proc. 2000 IEEE Ultrason. Symp.* 863–868 (2000).

[S8] Sanchez, G. F. P., Brad, A. M. & Saavedra, C. E. Thin Film Bulk Acoustic Wave Resonators for their Application in Microwave Filters. *4th Int. Conf. Electr. Electron. Eng.* 353–356 (2007).

[S9] Sung, P. H., Fang, C-M., Chang, P-Z., Chin Y-C. and Chen, P-Y., "The method for integrating FBAR with circuitry on CMOS chip," *Proceedings of the 2004 IEEE International Frequency Control Symposium and Exposition, 2004.*, Montreal, Quebec, Canada, 2004, pp. 562-565, doi: 10.1109/FREQ.2004.1418520.
